# Genotype V Japanese Encephalitis Virus Is Emerging

Ming-Hua Li<sup>1</sup>, Shi-Hong Fu<sup>1</sup>, Wei-Xin Chen<sup>1</sup>, Huan-Yu Wang<sup>1</sup>, Yu-Hong Guo<sup>2</sup>, Qi-Yong Liu<sup>2</sup>, Yi-Xing Li<sup>3</sup>, Hui-Ming Luo<sup>3</sup>, Wa Da<sup>4</sup>, Dun Zhu Duo Ji<sup>4</sup>, Xiu-Min Ye<sup>4</sup>, Guo-Dong Liang<sup>1\*</sup>

**1** State Key Laboratory for Infectious Disease Prevention and Control, Institute for Viral Disease Control and Prevention, Chinese Center for Disease Control and Prevention, Beijing, China, **2** National Institute for Communicable Disease Control and Prevention, Chinese Center for Disease Control and Prevention, Beijing, China, **3** Chinese Center for Disease Control and Prevention, Beijing, China, **4** Tibet Center for Disease Control and Prevention, Tibet, China

## Abstract

Japanese encephalitis (JE) is a global public health issue that has spread widely to more than 20 countries in Asia and has extended its geographic range to the south Pacific region including Australia. JE has become the most important cause of viral encephalitis in the world. Japanese encephalitis viruses (JEV) are divided into five genotypes, based on the nucleotide sequence of the envelope (E) gene. The Muar strain, isolated from patient in Malaya in 1952, is the sole example of genotype V JEV. Here, the XZ0934 strain of JEV was isolated from *Culex tritaeniorhynchus*, collected in China. The complete nucleotide and amino acid sequence of XZ0934 strain have been determined. The nucleotide divergence ranged from 20.3% to 21.4% and amino acid divergence ranged from 8.4% to 10.0% when compared with the 62 known JEV isolates that belong to genotype I–IV. It reveals low similarity between XZ0934 and genotype I–IV JEVs. Phylogenetic analysis using both complete genome and structural gene nucleotide sequences demonstrates that XZ0934 belongs to genotype V. This, in turn, suggests that genotype V JEV is emerging in JEV endemic areas. Thus, increased surveillance and diagnosis of viral encephalitis caused by genotype V JEV is an issue of great concern to nations in which JEV is endemic.

**Citation:** Li M-H, Fu S-H, Chen W-X, Wang H-Y, Guo Y-H, et al. (2011) Genotype V Japanese Encephalitis Virus Is Emerging. *PLoS Negl Trop Dis* 5(7): e1231. doi:10.1371/journal.pntd.0001231

**Editor:** Sunit Kumar Singh, Centre for Cellular and Molecular Biology (CCMB), India

**Received:** January 21, 2011; **Accepted:** May 21, 2011; **Published:** July 5, 2011

**Copyright:** © 2011 Li et al. This is an open-access article distributed under the terms of the Creative Commons Attribution License, which permits unrestricted use, distribution, and reproduction in any medium, provided the original author and source are credited.

**Funding:** This work was supported by grants from the Ministry of Science and Technology, China (2008ZX10004-008; 2009ZX10004-202; 2011CB504702); China-US CDC Cooperative Agreement U19-GH000004; and Development Grant of State Key Laboratory for Infectious Disease Prevention and Control (2008SKLID105). The funders had no role in study design, data collection and analysis, decision to publish, or preparation of the manuscript.

**Competing Interests:** The authors have declared that no competing interests exist.

\* E-mail: gdliang@hotmail.com

## Introduction

Japanese encephalitis (JE), which is caused by JE virus (JEV), is one of the most important viral encephalitis in the world [1–4]. It is prevalent mostly in Asia including eastern Asia [5–7], southern Asia [8] and southeast Asia [9,10]. JE has extended its geographic range to the south Pacific region, including Australia [11,12]. An estimated 3 billion persons live in countries where JE is endemic [1–3].

JEV has a zoonotic transmission cycle between mosquitoes (principally of the genus *Culex*) and vertebrate hosts such as bats, water birds and pigs [1,4]. Human beings contract JEV when bitten by infected mosquitoes. Around 35,000–50,000 JE cases are reported each year, of which 10,000–15,000 are fatal [1–3,13]. Approximately 50% of JE patients present severe neurological and mental sequelae such as motor deficits, and cognitive and language impairment [14–16].

JEV is a member of the genus *Flavivirus*, family *Flaviviridae* [1]. Like other flaviviruses, the JEV genome is a single-stranded positive-sense RNA of approximately 11 kb in length. It is capped at its 5' end and has a single open reading frame (ORF) that encodes a polyprotein. The ORF is flanked by 5' and 3' untranslated regions (UTRs). The viral structural proteins are encoded by the 5' one-third of the ORF and consist of the capsid (C), membrane (M; formed by proteolytic cleavage of its precursor protein PrM) and envelope (E) proteins. The remaining 3' region encodes non-structural proteins (NS1 to NS5) [1,17].

JEVs have been divided into five genotypes (genotype I, II, III, IV, V), based on nucleotide sequence of E gene [18]. Genotypes

I–IV have been isolated from many vectors [19–21], bats [22], and patients [7,8,21,23,24] in Asia (including eastern, southern and southeast Asia) and Australia. To date, the Muar strain, which was isolated from specimens of brain tissues of patients with viral encephalitis in Malaya in 1952, is the only example of genotype V JEV [18,25]. Since that time, no genotype V JEV has been detected. In this study, genotype V JEV was isolated from *Culex tritaeniorhynchus* collected in China in 2009. This suggests that genotype V JEV is re-emerging in Asian country after a 57 year hiatus.

## Materials and Methods

### Cell cultures

C6/36 (*Aedes albopictus*) cell line was grown in minimal essential medium (HyClone) with Hanks' salt solution supplemented with 10% fetal bovine serum (FBS, HyClone), 2 mM glutamine, 0.12% NaHCO<sub>3</sub>, and 100 U ml<sup>-1</sup> penicillin and streptomycin. Cells were propagated and maintained at 28°C [21]. BHK-21 cells were grown in minimal essential medium (HyClone) with Earl's balanced salt solution supplemented with 10% FBS, 2 mM glutamine, 0.12% NaHCO<sub>3</sub>, and 100 U ml<sup>-1</sup> penicillin and streptomycin. BHK-21 cells were propagated and maintained at 37°C under a 5% CO<sub>2</sub> atmosphere [21].

### Mosquito collection

An arbovirus survey was conducted in Tibet in the summer of 2009. Mosquitoes were collected in Mainling County (altitude

## Author Summary

Japanese encephalitis virus (JEV) is a mosquito-borne virus that causes Japanese encephalitis (JE) with significant morbidity and mortality. Five genotypes (genotype I–V) have been identified based on the nucleotide sequence of viral envelope (E) gene of JEV. To date, the only known strain of genotype V is Muar strain, isolated from patient in Malaya in 1952. Since then, no genotype V JEV has been detected in the world. In this study, the JEV strain, XZ0934, was isolated from mosquito samples collected in China in 2009. The full-length genome sequences of the XZ0934 strain was determined and founded to be the second strain of genotype V JEV based on the phylogenetic analysis using the complete genome and structural gene sequences. This suggests that genotype V JEV is re-emerging after 57 years (1952–2009). Therefore, increased surveillance and more effective diagnosis for cases of JE caused by genotype V JEV are needed.

2900 m) and Medog County (altitude 1000 m) in the Nyingchi area of Tibet. Mosquito samples were collected using mosquito-trapping lamps (Wuhan Lucky Star Environmental Protection Tech Co., Ltd., Hubei, China) in the evening. Collection locations were proximal to sites of frequent human activity. Collection nets containing mosquitoes were frozen for 30 min at  $-20^{\circ}\text{C}$  and transferred onto an ice plate for determination of mosquito species (blood-fed and male mosquitoes were discarded). Female mosquitoes were identified to species level by morphologic characteristics and sorted into pools of 100 specimens according to species. The pools were put into collection tubes individually and stored in liquid nitrogen [26,27].

## Virus isolation

Mosquito pools were added to 1.5 ml minimal essential medium (HyClone), supplemented with 2 mM glutamine, 0.12%  $\text{NaHCO}_3$ , and 100  $\text{U ml}^{-1}$  penicillin and streptomycin, followed by grinding in a pre-cooled sterile plastic grinding tube using a TissueLyser (QIAGEN, Germany). Homogenized samples were centrifuged at  $17,000 \times g$  in a microcentrifuge for 20 min at  $4^{\circ}\text{C}$ , and the clarified supernatants were used to inoculate monolayers of BHK-21 and C6/36 cells and incubated at  $37^{\circ}\text{C}$  and  $28^{\circ}\text{C}$ , respectively. The cells were observed daily to check for development of cytopathic effects (CPE). A sample was regarded as virus-positive if it caused CPE in successive cell passages [26,27].

## Virus purification

Viral supernatants were applied to six-well plates (Corning, USA) of confluent BHK-21 cells and incubated for one hour. Plates were first overlaid with medium containing 75% agarose and then with medium containing neutral red vital stain after three days incubation at  $37^{\circ}\text{C}$  in a 5%  $\text{CO}_2$  incubator. Plaques of different sizes and shape were shattered in 500  $\mu\text{l}$  MEM medium after being picked out using a sterile pipette tip. As described previously [28], this process was repeated until a single plaque-shaped virus was obtained.

## RNA extraction, reverse transcription and PCR amplification

Viral RNA was extracted from 140  $\mu\text{l}$  supernatant from virus-infected BHK-21 cell cultures using a Viral RNA Mini Kit (QIAGEN, Germany) according to the manufacturer's instruc-

tions. cDNA was synthesized using a Ready-to-Go You-Prime First-Strand Beads Kit (GE healthcare, UK) and random hexanucleotide primers. PCR amplification using universal primers specific for flaviviruses, alphaviruses and bunyaviruses was conducted for identification of virus isolates [29]. Primers (Table 1) were designed for full-length genome amplification and sequencing of JEV using the PREMIER Primer 5 software package. Thermal cycling parameters were as follows: one cycle of denaturation ( $94^{\circ}\text{C}$ , 5 min) followed by 35 cycles of  $94^{\circ}\text{C}$  denaturation for 30 s,  $55^{\circ}\text{C}$  annealing for 30 s, and  $72^{\circ}\text{C}$  extension for 1 min. The programme ended with an extension step at  $72^{\circ}\text{C}$  for 10 min. Amplified products were examined by agarose gel electrophoresis (1%), purified using a QIAquick Gel Extraction kit (QIAGEN, Germany), and then sequenced directly. Sequencing of the 5' UTR and 3' UTR were determined by using 5' RACE and 3' RACE system for Rapid Amplification of cDNA Ends (Invitrogen) respectively. 5' RACE was performed according to standard protocols (Invitrogen 5' RACE kit). 3' RACE was performed by first adding a polyA tail using PolyA polymerase (New England Biolabs) and then conduct RT-PCR with gene specific primers and an oligo-dT-adaptor primer.

## Multiple alignments and sequence analyses

The full-length genome of the XZ0934 strain was compiled using SeqMan in the Lasergene software package (DNASTAR). Nucleotide and amino acid sequence alignments were generated by ClustalX version 2.0.9 [22,30]. Analysis of nucleotide and deduced

**Table 1.** Primers used for RT-PCR and sequencing of XZ0934 in this study.

| Primer   | Sequence (5'–3')     | Position    | Orientation |
|----------|----------------------|-------------|-------------|
| JEV-V-1  | AGAAGTTTATCTGTGGAAC  | 1–21        | Sense       |
| JEV-V-2  | CACAAGAGCATAGCCTGGAT | 868–887     | Antisense   |
| JEV-V-3  | AGGGACTAATAGATGTTGGG | 563–582     | Sense       |
| JEV-V-4  | TCAGAGTGATGGAAGGAG   | 1495–1512   | Antisense   |
| JEV-V-5  | GCGAACGACAAACCAACA   | 1080–1097   | Sense       |
| JEV-V-6  | GACGTAATGCCAAACCCA   | 2951–2968   | Antisense   |
| JEV-V-7  | GCCATTGACATAACCCAGAA | 2490–2508   | Sense       |
| JEV-V-8  | ATCAAGGCCAAATGAACT   | 3755–3772   | Antisense   |
| JEV-V-9  | ATACGGCCCATGAAGCAT   | 3480–3497   | Sense       |
| JEV-V-10 | CTCGAGCCATTATCCTGTA  | 4674–4692   | Antisense   |
| JEV-V-11 | GGCCATCATCCCAGCAGCT  | 4553–4571   | Sense       |
| JEV-V-12 | CCTTAAGAGCTTCTGCCAT  | 5301–5320   | Antisense   |
| JEV-V-13 | AACAGCTGTTCTAGCGCC   | 5261–5278   | Sense       |
| JEV-V-14 | CCATTGTGAAAGCCTTCTCC | 6149–6168   | Antisense   |
| JEV-V-15 | AGAGTAGGCAGAAATCCGAA | 5988–6007   | Sense       |
| JEV-V-16 | GAGGCTAGTGATGTTGTAC  | 7107–7126   | Antisense   |
| JEV-V-17 | GATGCAACGAAAGGCATAG  | 6677–6696   | Sense       |
| JEV-V-18 | TGAGACAAACCTTTCTCCA  | 7876–7895   | Antisense   |
| JEV-V-19 | CCTGTGGGATAATGGAGC   | 7538–7555   | Sense       |
| JEV-V-20 | TTGGTGGTTTCGTCCAGCAC | 8802–8821   | Antisense   |
| JEV-V-21 | AATGTAAGGGTTAGTGG    | 8333–8350   | Sense       |
| JEV-V-22 | CTTACGTCGGCCTGACTCCC | 10465–10484 | Antisense   |
| JEV-V-23 | CAAATGTGGCTCCTCTCT   | 9972–9990   | Sense       |
| JEV-V-24 | AGATCCTGTGTTCTTCTCA  | 10964–10983 | Antisense   |

doi:10.1371/journal.pntd.0001231.t001

amino acid sequence identities was performed using GeneDoc and MegAlign in the Lasergene software package (DNASTAR).

### Phylogenetic analysis

Full-length nucleotide sequences of 32 selected JEV strains of varying genotype isolated from different locations and sources, and across a number of years, were downloaded from GenBank (Table 2). The reported structural gene sequence of genotype V JEV (Muar strain) [25] was used to build phylogenetic trees. Neighbor-joining phylogenetic trees based on nucleotide sequences were constructed using MEGA version 4.0.2 [18,31]. The robustness of phylogenetic constructions was evaluated by bootstrapping using 1000 replicates.

To better understand the phylogenetic relationship between genotype V JEV and other flaviviruses, full-length nucleotide sequences of previously published JEV strains and other flaviviruses were downloaded from GenBank, including sequences from Murray Valley encephalitis virus (MVEV), West Nile virus (WNV), Kunjin virus (KUNV), St. Louis encephalitis virus (SLEV), Dengue virus 1

(DENV1), Dengue virus 2 (DENV2), Dengue virus 3 (DENV3), Dengue virus 4 (DENV4), Yellow fever virus (YFV), Powassan virus (POWV), Langat virus (LANV), Louping ill virus (LIV), Tick-borne encephalitis virus (TBEV) and Culex flavivirus (Table 3).

## Results

### Virus isolation and purification

After homogenized supernatants were inoculated onto monolayers of BHK-21 and C6/36 cells, a single pool containing 100 specimens of *Culex tritaeniorhynchus* yielded a virus isolate designated XZ0934. The supernatant of pool XZ0934 caused cytopathic effects (CPE) in BHK-21 and C6/36 cells in successive cell passages. The C6/36 cells became aggregate, and showed fusion and shedding while the BHK-21 cells became aggregate and began shedding by 72 h post-infection. All plaques in BHK-21 cell monolayers were of identical size (mean 1.5 mm, n = 10). Two plaques were picked from them and subjected to a second round of plaque purification. The resultant data were consistent with the former.

**Table 2.** Background information of 32 selected strains of Japanese encephalitis virus used in this study.

| No. | Genotype | Strain             | Year | Location  | Source         | GenBank accession no. |
|-----|----------|--------------------|------|-----------|----------------|-----------------------|
| 1   | I        | K94P05             | 1994 | Korea     | Mosquito       | AF045551              |
| 2   | I        | KV1899             | 1999 | Korea     | Pig            | AY316157              |
| 3   | I        | Ishikawa           | 1998 | Japan     | Mosquito       | AB051292              |
| 4   | I        | JEV/sw/Mie/41/2002 | 2002 | Japan     | Pig            | AB241119              |
| 5   | I        | JEV/sw/Mie/40/2004 | 2004 | Japan     | Pig            | AB241118              |
| 6   | I        | SC04-17            | 2004 | China     | Mosquito       | GU187972              |
| 7   | I        | HEN0701            | 2007 | China     | Pig            | FJ495189              |
| 8   | I        | XJ69               | 2007 | China     | Mosquito       | EU880214              |
| 9   | I        | XJP613             | 2007 | China     | Mosquito       | EU693899              |
| 10  | I        | SH17M-07           | 2007 | China     | Mosquito       | EU429297              |
| 11  | I        | JX61               | 2008 | China     | Pig            | GU556217              |
| 12  | II       | FU                 | 1995 | Australia | Human          | AF217620              |
| 13  | III      | Vellore P20778     | 1958 | India     | Human          | AF080251              |
| 14  | III      | GP78               | 1978 | India     | Human          | AF075723              |
| 15  | III      | 014178             | 2001 | India     | Human          | EF623987              |
| 16  | III      | 04940-4            | 2002 | India     | Mosquito       | EF623989              |
| 17  | III      | 057434             | 2005 | India     | Human          | EF623988              |
| 18  | III      | Nakayama           | 1935 | Japan     | Human          | EF571853              |
| 19  | III      | JaGAR01            | 1959 | Japan     | Mosquito       | AF069076              |
| 20  | III      | JaOH0566           | 1966 | Japan     | Human          | AY508813              |
| 21  | III      | JaOAr5982          | 1982 | Japan     | Mosquito       | M18370                |
| 22  | III      | K87P39             | 1987 | Korea     | Mosquito       | AY585242              |
| 23  | III      | p3                 | 1949 | China     | Human          | U47032                |
| 24  | III      | Beijing-1          | 1949 | China     | Human          | L48961                |
| 25  | III      | SA14-14-2          | 1954 | China     | Vaccine strain | AF315119              |
| 26  | III      | HW                 | 1988 | China     | Pig            | AY849939              |
| 27  | III      | WHe                | 1988 | China     | Pig            | EF107523              |
| 28  | III      | SH0601             | 2006 | China     | Pig            | EF543861              |
| 29  | III      | Ling               | 1965 | Taiwan    | Human          | L78128                |
| 30  | III      | CH1392             | 1990 | Taiwan    | Mosquito       | AF254452              |
| 31  | III      | T1P1               | 1997 | Taiwan    | Mosquito       | AF254453              |
| 32  | IV       | JKT6468            | 1981 | Indonesia | Mosquito       | AY184212              |

doi:10.1371/journal.pntd.0001231.t002

**Table 3.** Background information of 14 selected strains of Flaviviruses used in this study.

| Virus                                   | Strain                     | GenBank accession no. |
|-----------------------------------------|----------------------------|-----------------------|
| Murray Valley encephalitis virus (MVEV) | MVE-1-51                   | NC_000943             |
| West Nile virus (WNV)                   | ArB3573/82                 | DQ318020              |
| Kunjin virus (KUNV)                     | MRM61C                     | D00246                |
| St. Louis encephalitis virus (SLEV)     | Kern217                    | DQ525916              |
| Dengue virus 1 (DENV1)                  | SG(EH)D1227Y03             | FJ469909              |
| Dengue virus 2 (DENV2)                  | D2/SG/05K4155DK1/2005      | EU081180              |
| Dengue virus 3 (DENV3)                  | D3/H/IMTSSA-MART/1999/1243 | AY099337              |
| Dengue virus 4 (DENV4)                  | 341750                     | GU289913              |
| Yellow fever virus (YFV)                | 17D/Tiantan                | FJ654700              |
| Powassan virus (POWV)                   | Spassk-9                   | EU770575              |
| Langat virus (LANV)                     | TP21                       | NC_003690             |
| Louping ill virus (LIV)                 | 369/T2                     | NC_001809             |
| Tick-borne encephalitis virus (TBEV)    | Toro-2003                  | DQ401140              |
| Culex flavivirus                        | Tokyo                      | AB262759              |

doi:10.1371/journal.pntd.0001231.t003

### Virus identification

Viral RNA was extracted and amplified by PCR using primers specific for flaviviruses, alphaviruses and bunyaviruses. XZ0934 was positive when primers specific for flaviviruses (FU1/cFD2) [29] were used, and nucleotide sequencing confirmed that XZ0934 was a JEV. To ensure the consistency of different viral plaques, six purified plaques were picked and amplified using flavivirus-specific primers (FU1/cFD2). The nucleotide and amino acid sequence identities of the six purified plaques were 100%. This indicates that each of the six purified plaques was generated by an identical JEV strain. Therefore, one plaque was selected for full-length genome amplification and sequencing.

### Determination of viral genome sequence

Recent reports have suggested that JEVs currently circulating in China belong to genotypes I and III [5–7,21–23]. Thus, 32 primers were designed using the complete sequences of genotype I JEV Ishikawa (GenBank accession number AB051292) and 48 from the sequence of genotype III JEV Beijing-1 (GenBank accession number L48961). These were used for amplification of the entire XZ0934 genome. PCRs were positive with 4 genotype I and 10 genotype III primers. Based on obtained nucleotide sequences, primers were designed to close the majority of gaps between assembled contigs by PCR amplification in order to determine the whole genome of XZ0934. A further 24 primers

(Table 1) were designed and used to verify the accuracy of sequencing. The complete genome (10,983 nt) of XZ0934 was sequenced (GenBank accession no. JF915894) and found to possess one open reading frame (ORF). When the complete genome sequence of isolate XZ0934 was compared with those of 62 known JEV isolates (genotypes I–IV) in Genbank, sequence identities varied from 78.6% (KV1899, K94P05) to 79.7% (CC27-L1) and amino acid sequence identity from 90.0% (KV1899, K94P05) to 91.6% (K87P39). Thus, these data reveal low similarity between XZ0934 and genotype I–IV JEVs.

Because the structural gene sequence of genotype V (Muar) has been reported [25], an identity analysis of JEV structural genes (C, PrM, M, E) of XZ0934, Muar and other selected genotype I–IV JEV strains was conducted (Table 4). C gene sequence homology varied from 78.2% (G IV, JKT 6468) to 88.5% (G V, Muar) for nucleotides and 72.4% (G IV, JKT 6468) to 85.8% (G V, Muar) for amino acids. That of the PrM gene varied from 71.7% (G IV, JKT 6468) to 84.1% (G V, Muar) for nucleotides and 81.5% (G IV, JKT 6468) to 90.2% (G V, Muar) for amino acids. M gene sequence homology varied from 80.0% (G IV, JKT 6468) to 95.6% (G V, Muar) for nucleotides and 85.3% (G IV, JKT 6468) to 100.0% (G V, Muar) for amino acids. E gene sequence homology varied from 77.0% (G I, Ishikawa) to 86.0% (G V, Muar) for nucleotides and 89.4% (G I, Ishikawa) to 93.2% (G V, Muar) for amino acids. These data demonstrate that the structural

**Table 4.** Sequence homology between XZ0934 and five genotype JEV strains in structural gene.

| Genotype | Strain                     | Percentage homology of nucleotides (amino acids) |               |                |               |
|----------|----------------------------|--------------------------------------------------|---------------|----------------|---------------|
|          |                            | C                                                | PrM           | M              | E             |
| G I      | Ishikawa (AB051292)        | 79.5% (77.2%)                                    | 78.3% (87.0%) | 84.0% (93.3%)  | 77.0% (89.4%) |
| G II     | FU (AF217620)              | 81.4% (78.7%)                                    | 74.3% (84.8%) | 81.8% (94.7%)  | 77.5% (90.6%) |
| G III    | p3 (U47032)                | 81.4% (78.0%)                                    | 76.8% (85.9%) | 83.6% (93.3%)  | 77.4% (90.2%) |
| G IV     | JKT 6468 (AY184212)        | 78.2% (72.4%)                                    | 71.7% (81.5%) | 80.0% (85.3%)  | 77.5% (90.6%) |
| G V      | Muar (Hasegawa et al.(25)) | 88.5% (85.8%)                                    | 84.1% (90.2%) | 95.6% (100.0%) | 86.0% (93.2%) |

doi:10.1371/journal.pntd.0001231.t004

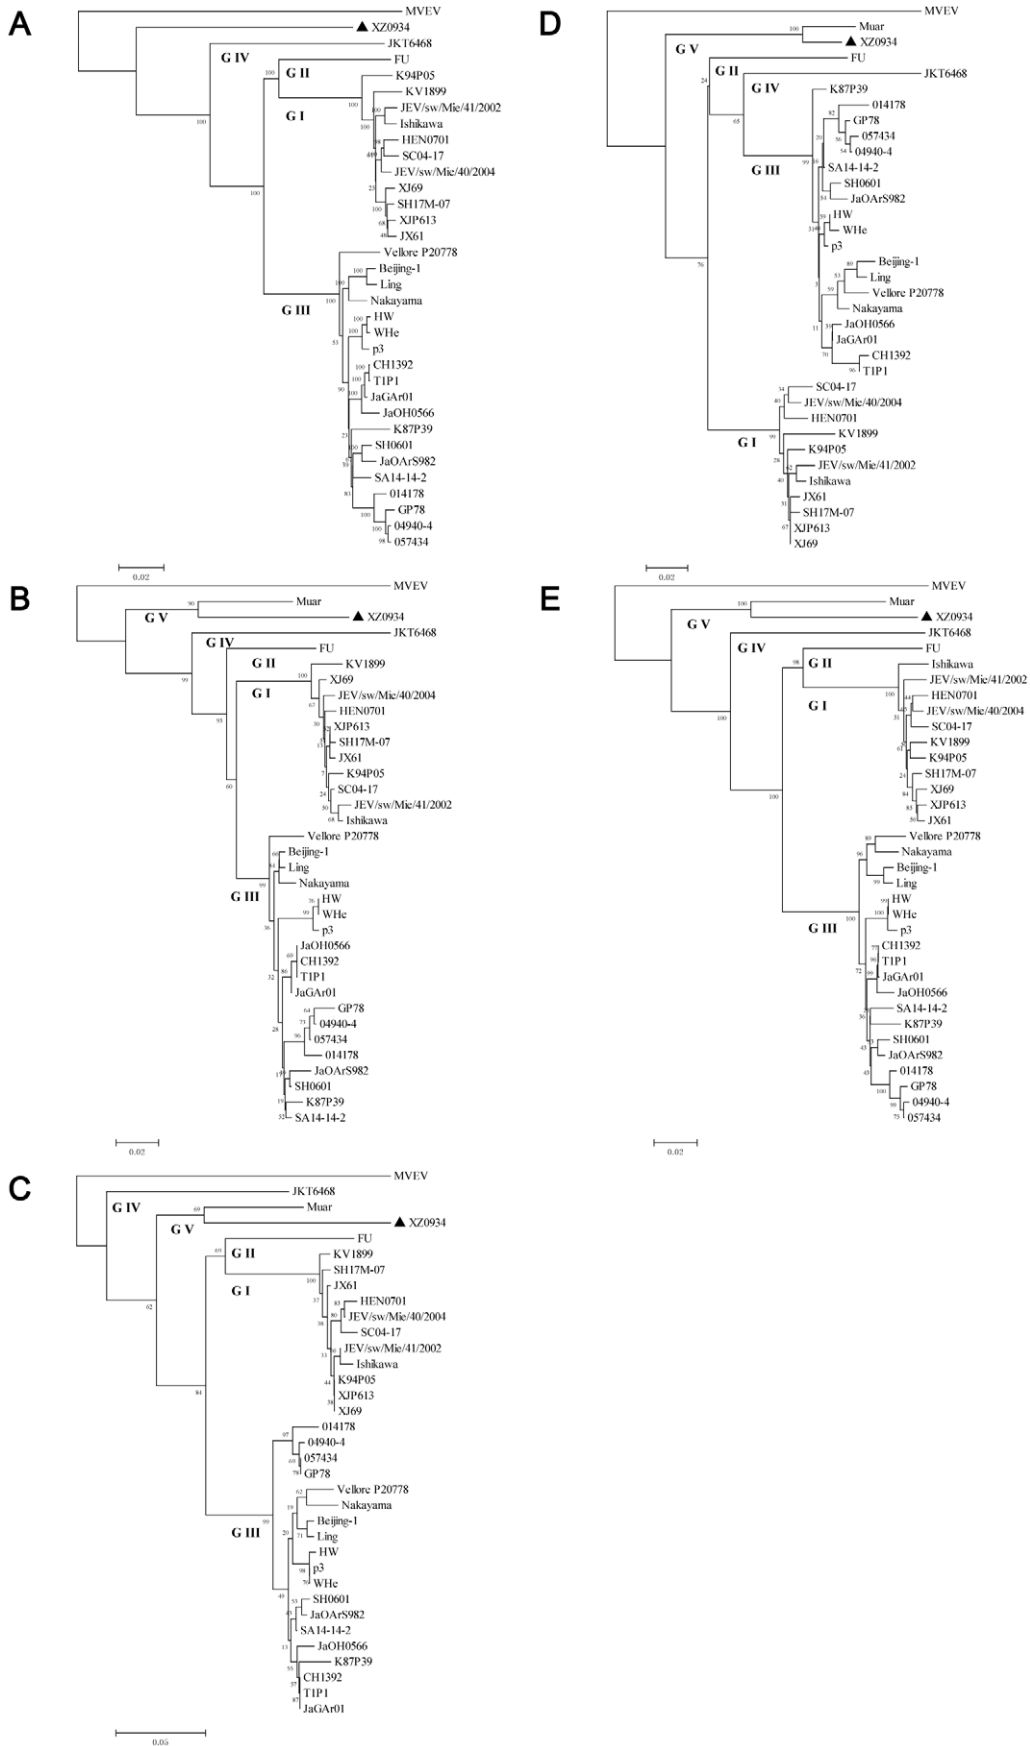

**Figure 1. Phylogenetic analysis of XZ0934 and other JEV strains based on the nucleotide sequences.** A) complete genome; B) C gene; C) PrM gene; D) M gene; E) E gene. Phylogenetic analyses were performed by the neighbor-joining method using MEGA version 4.0.2 software package ([www.megasoftware.net](http://www.megasoftware.net)). The tree was rooted using Murray Valley encephalitis virus (MVEV) strain MVE-1-51 as an outgroup. Bootstrap probabilities of each node were calculated using 1000 replicates. Scale bars indicate the number of nucleotide substitutions per site. doi:10.1371/journal.pntd.0001231.g001

gene sequence homology of XZ0934 was higher with genotype V JEV (Muar) than with other genotype I–IV JEV strains.

### Phylogenetic analysis

To establish the phylogenetic relationship between XZ0934 and other JEV strains, a phylogenetic tree was constructed using the complete genome sequences of XZ0934 and 32 selected JEV strains (genotypes I–IV). Murray Valley encephalitis virus (MVEV) was used as an outgroup. Five distinct phylogenetic groups were identified. The XZ0934 strain, which was isolated from China, formed a branch divergent from other genotype I–IV JEV strains (Figure 1A). Therefore, XZ0934 should be regarded as a novel, non-genotype I–IV, JEV isolate.

To study their phylogenetic relationship, a phylogenetic tree was constructed using the reported structural gene nucleotide sequences of Muar [25], XZ0934, and other JEV strains (genotype I–IV). No matter which structural gene was used to construct the phylogenetic tree, the topology was similar. Five distinct phylogenetic groups were evident in each tree. XZ0934 and Muar fell into the same group when the tree was constructed using the C (Figure 1B), PrM (Figure 1C), M (Figure 1D) or E (Figure 1E) genes. This result suggested that XZ0934 was a novel genotype V JEV isolate.

A phylogenetic tree was also constructed using genomic nucleotide sequences in order to understand the phylogenetic relationship between XZ0934 and other flaviviruses. Data indicated that XZ0934 was indeed a JEV rather than any of the other 14 flaviviruses (Figure 2).

### Discussion

In recent years, the sequence of the JEV viral envelope (E) gene has been used by various authors to perform phylogenetic analyses [18,21,32,33]. Based on the resultant data, JEV strains have been

divided into five genotypes (genotypes I–V) [18]. Genotypes I and III are distributed widely in Asia, including Japan, Korea, China, India, Vietnam and Philippines. Genotype II includes isolates from southern Thailand, Malaysia, Indonesia, and northern Australia. Genotype IV has been isolated only in Indonesia [18]. The Muar strain, isolated in Malaya in 1952, is regarded as the only genotype V JEV isolate [18,25,33]. In this study, phylogenetic analysis of structural genes and whole genome sequences also suggested the existence of five JEV genotypes. Thus, the E gene is confirmed to be a useful phylogenetic marker for JEV.

Primers designed for JEV genotypes I and III were used for full-length amplification of XZ0934. Of these, only a few (4/32 genotype I and 10/48 genotype III) resulted in successful amplification. This suggests a low whole genome sequence homology between XZ0934 and genotype I and I JEV isolates. In order to further understand the differences between XZ0934 and other JEV strains (genotype I–IV), an identity analysis was conducted using the full-length nucleotide sequences of XZ0934 and 62 known JEV isolates (genotypes I–IV) in Genbank. Data suggested that XZ0934 and the genotype I–IV JEV strains were dissimilar. The nucleotide sequence identity varied from 78.6% to 79.7% and amino acid sequence identity from 90.0% to 91.6%. Indeed, the sequence divergence ranged from 20.3% to 21.4% (nt) and 8.4%–10.0% (aa). It has been suggested that the nucleotide sequence divergence between different JEV genotypes is ~10% [13]. The sequence divergence (20.3%–21.4%) between XZ0934 and the genotype I–IV JEVs was greater than 10%, suggesting that XZ0934 is not a member of JEV genotypes I–IV. To confirm that XZ0934 was a JEV and not some other flavivirus, 14 flavivirus strains, including mosquito-borne and tick-borne flaviviruses, were used to build a phylogenetic tree. The data indicated that XZ0934 was indeed a JEV (Fig. 2).

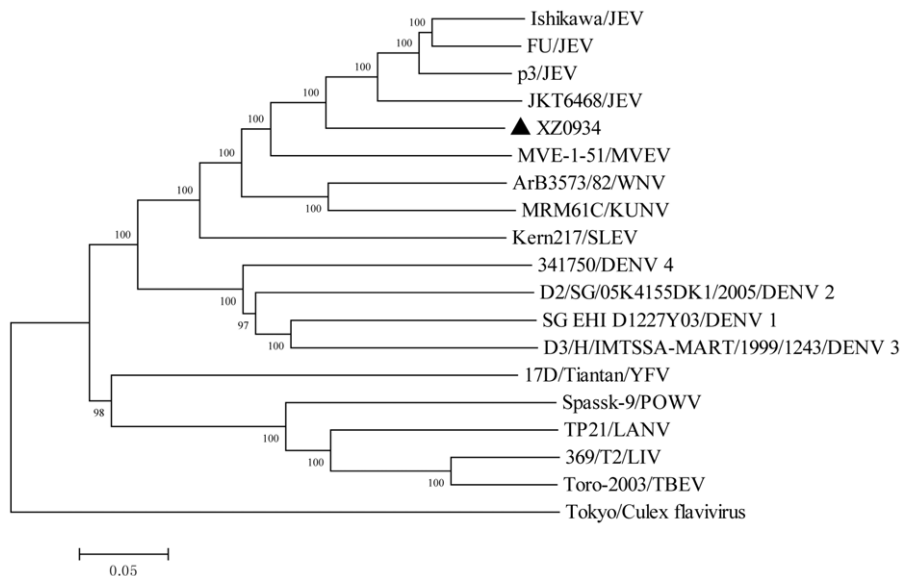

**Figure 2. Phylogenetic analysis of XZ0934 and other flaviviruses constructed using complete genome sequences.** Phylogenetic analyses were performed by the neighbor-joining method using MEGA version 4.0.2 software package ([www.megasoftware.net](http://www.megasoftware.net)). Bootstrap probabilities of each node were calculated using 1000 replicates. Scale bars indicate the number of nucleotide substitutions per site. doi:10.1371/journal.pntd.0001231.g002

Four viral encephalitis cases were reported in Malaya (n = 1) and Singapore (n = 3) in the summer of 1952. All patients exhibited high fever, vomiting, headache, disturbance of consciousness, stiff neck and deep coma with rapid progression to death by respiratory failure. Four virus strains were isolated from brain tissue specimens and identified as JEV by neutralization test using the Japanese Nakayama JEV strain [24]. Of these, the Muar strain, isolated from a 19-year-old male patient in Malaya in 1952, has been assigned to genotype V based on the E gene sequence [18,25,32,33]. During the following 57 years (1952–2009), no genotype V JEV has been reported. In this study, XZ0934, isolated from *Culex tritaeniorhynchus* collected in China, has been identified as a genotype V JEV, based on phylogenetic analysis using both full-length genome and structural gene nucleotide sequences. This represents only the second instance of isolation of genotype V JEV worldwide since 1952. Thus, genotype V JEV is not limited to southeast Asia and has begun to emerge in the world.

Many factors may contribute to spread of JEV [1,2], such as changed agricultural practices (which provide new breeding sites for mosquitoes), animal husbandry (which provides host animals for transmission) [34], migrating birds and even wind-blown mosquitoes [11,35]. Each of the five known JEV genotypes

originated in the Indonesia-Malaysia region [18], so why has genotype V JEV not been detected for 57 years? How did it spread to China from southeast Asia, a distance of thousands of kilometers? Does this virus exist somewhere along the path from Malaysia to China? All these issues are worthy of further study. Moreover, genotype V JEV was first isolated from human specimens, suggesting a high pathogenicity and the possibility of viral encephalitis. Therefore, increased surveillance and more effective diagnosis of viral encephalitis caused by genotype V JEV is an issue of great concern to nations in which JEV is endemic.

## Acknowledgments

We would like to thank Hong-Yue Jiang and Jing-Lin Wang in State Key Laboratory for Infectious Disease Prevention and Control, Institute for Viral Disease Control and Prevention, Chinese Center for Disease Control and Prevention for technical assistance.

## Author Contributions

Conceived and designed the experiments: M-HL H-YW G-DL. Performed the experiments: M-HL S-HF W-XC. Analyzed the data: M-HL S-HF H-YW G-DL. Contributed reagents/materials/analysis tools: Y-HG Q-YL Y-XL H-ML WD DZDJ X-MY. Wrote the paper: M-HL G-DL.

## References

- Lindenbach BD, Thiel H-J, Rice CM (2007) Flaviviridae: The Viruses and Their Replication. In: Knipe DM, Howley PM, eds. *Fields Virology*. Fifth ed. Philadelphia: Lippincott Williams and Wilkins. pp 1101–1152.
- Erlanger TE, Weiss S, Keiser J, Utzinger J, Wiedemayer K (2009) Past, present, and future of Japanese encephalitis. *Emerg Infect Dis* 15: 1–7.
- United Nations (2005) The United Nations urbanization prospects: the 2005 revision. POP/DB/WUP/Rev.2005/1/FI. New York: United Nations.
- Ghosh D, Basu A (2009) Japanese encephalitis—a pathological and clinical perspective. *PLoS Negl Trop Dis* 3: e437.
- Gao XY, Nasci R, Liang GD (2010) The neglected arboviral infections in mainland China. *PLoS Negl Trop Dis* 4: e624.
- Wang H, Li Y, Liang X, Liang G (2009) Japanese encephalitis in mainland China. *Jpn J Infect Dis* 62: 331–336.
- Wang LH, Fu SH, Wang HY, Liang XF, Cheng JX, et al. (2007) Japanese encephalitis Yuncheng, China, 2006. *Emerg Infect Dis* 13: 1123–1125.
- Parida M, Dash PK, Tripathi NK, Ambuj, Sannarangaiah S, et al. (2006) Japanese Encephalitis Outbreak, India, 2005. *Emerg Infect Dis* 12: 1427–1430.
- Nga PT, del Carmen Parquet M, Cuong VD, Ma SP, Hasebe F, et al. (2004) Shift in Japanese encephalitis virus (JEV) genotype circulating in northern Vietnam: implications for frequent introductions of JEV from Southeast Asia to East Asia. *J Gen Virol* 85: 1625–1631.
- Nitatapattana N, Dubot-Péres A, Gouilh MA, Souris M, Barbazan P, et al. (2008) Change in Japanese encephalitis virus distribution, Thailand. *Emerg Infect Dis* 14: 1762–1765.
- Hanna JN, Ritchie SA, Phillips DA, Shield J, Bailey MC, et al. (1996) An outbreak of Japanese encephalitis in the Torres Strait, Australia, 1995. *Med J Aust* 165: 256–260.
- Hanna JN, Ritchie SA, Phillips DA, Lee JM, Hills SL, et al. (1999) Japanese encephalitis in north Queensland, Australia, 1998. *Med J Aust* 170: 533–536.
- Solomon T (2006) Control of Japanese encephalitis—within our grasp? *N Engl J Med* 355: 869–871.
- Solomon T, Dung NM, Kneen R, Gainsborough M, Vaughn DW, et al. (2000) Japanese encephalitis. *J Neurol Neurosurg Psychiatry* 68: 405–415.
- Tyler KL (2009) Emerging viral infections of the central nervous system. *Arch Neurol* 66: 939–948.
- Wilder-Smith A, Freedman DO (2009) Japanese encephalitis: is there a need for a novel vaccine? *Expert Rev Vaccines* 8: 969–972.
- Chambers TJ, Hahn CS, Galler R, Rice CM (1990) Flavivirus genome organization, expression, and replication. *Annu Rev Microbiol* 44: 649–688.
- Solomon T, Ni H, Beasley DW, Ekkelenkamp M, Cardoso MJ, et al. (2003) Origin and evolution of Japanese encephalitis virus in southeast Asia. *J Virol* 77: 3091–3098.
- Ma SP, Yoshida Y, Makino Y, Tadano M, Ono T, et al. (2003) A major genotype of Japanese encephalitis virus currently circulating in Japan. *Am J Trop Med Hyg* 69: 151–154.
- Yun SI, Kim SY, Choi WY, Nam JH, Ju YR, et al. (2003) Molecular characterization of the full-length genome of the Japanese encephalitis viral strain K87P39. *Virus Res* 96: 129–140.
- Wang HY, Takasaki T, Fu SH, Sun XH, Zhang HL et al (2007) Molecular epidemiological analysis of Japanese encephalitis virus in China. *J Gen Virol* 88: 885–894.
- Wang JL, Pan XL, Zhang HL, Fu SH, Wang HY, et al. (2009) Japanese encephalitis viruses from bats in Yunnan, China. *Emerg Infect Dis* 15: 939–942.
- Wang L, Fu S, Zhang H, Ye X, Yu D, et al. (2010) Identification and isolation of Genotype-I Japanese Encephalitis virus from encephalitis patients. *Virol J* 7: 345.
- Hale Jh, Lim Ka, Chee Ph (1952) Japanese type B encephalitis in Malaya. *Ann Trop Med Parasitol* 46: 220–226.
- Hasegawa H, Yoshida M, Fujita S, Kobayashi Y (1994) Comparison of structural proteins among antigenically different Japanese encephalitis virus strains. *Vaccine* 12: 841–844.
- Lu Z, Lu XJ, Fu SH, Zhang S, Li ZX, et al. (2009) Tahyna virus and human infection, China. *Emerg Infect Dis* 15: 306–309.
- Sun X, Fu S, Gong Z, Ge J, Meng W, et al. (2009) Distribution of arboviruses and mosquitoes in northwestern Yunnan Province, China. *Vector-Borne and Zoonotic Dis* 9: 623–630.
- Keller BC, Fredericksen BL, Samuel MA, Mock RE, Mason PW, et al. (2006) Resistance to alpha/beta interferon is a determinant of West Nile virus replication fitness and virulence. *J Virol* 80: 9424–9434.
- Kuno G (1998) Universal diagnostic RT-PCR protocol for arboviruses. *J Virol Methods* 72: 27–41.
- Thompson JD, Gibson TJ, Plewniak F, Jeanmougin F, Higgins DG (1997) The CLUSTAL\_X windows interface: flexible strategies for multiple sequence alignment aided by quality analysis tools. *Nucleic Acids Res* 25: 4876–4882.
- Kumar S, Tamura K, Nei M (2004) MEGA3: Integrated software for Molecular Evolutionary Genetics Analysis and sequence alignment. *Brief Bioinform* 5: 150–163.
- Uchil PD, Satchidanandam V (2001) Phylogenetic analysis of Japanese encephalitis virus: envelope gene based analysis reveals a fifth genotype, geographic clustering, and multiple introductions of the virus into the Indian subcontinent. *Am J Trop Med Hyg* 65: 242–251.
- Mohammed MA, Galbraith SE, Radford AD, Dove W, Takasaki T, et al. (2011) Molecular phylogenetic and evolutionary analyses of Muar strain of Japanese encephalitis virus reveal it is the missing fifth genotype. *Infect Genet Evol*. (in press).
- Tsai, F T (1997) Factors in the changing epidemiology of Japanese encephalitis and West Nile fever. In J. F. Saluzzo and B. Dodet (ed.), *Factors in the emergence of arbovirus diseases*. Elsevier: Paris, France. pp 179–189.
- Innis, L B (1995) Japanese encephalitis. In JS. Porterfield, ed. *Exotic viral infections*. Chapman & Hall: London, United Kingdom. pp 147–174.
